# Supplementary material for: Prospective, Longitudinal Pilot Study: Daily Self-Imaging with Patient-Operated Home OCT in Neovascular Age-Related Macular Degeneration
Source: PubMed Central journal article supplement — Ophthalmol Sci. 2021 Jun 26;1(2):100034. doi: 10.1016/j.xops.2021.100034 (PMC9562348; doi:10.1016/j.xops.2021.100034), 2021-06-26

Supplementary Figure 2. The forehead positioning feedback system of the Notal Home OCT Device

Left image: patient view with forehead not on the forehead rest

Right image: patient view with forehead gently touching the forehead rest

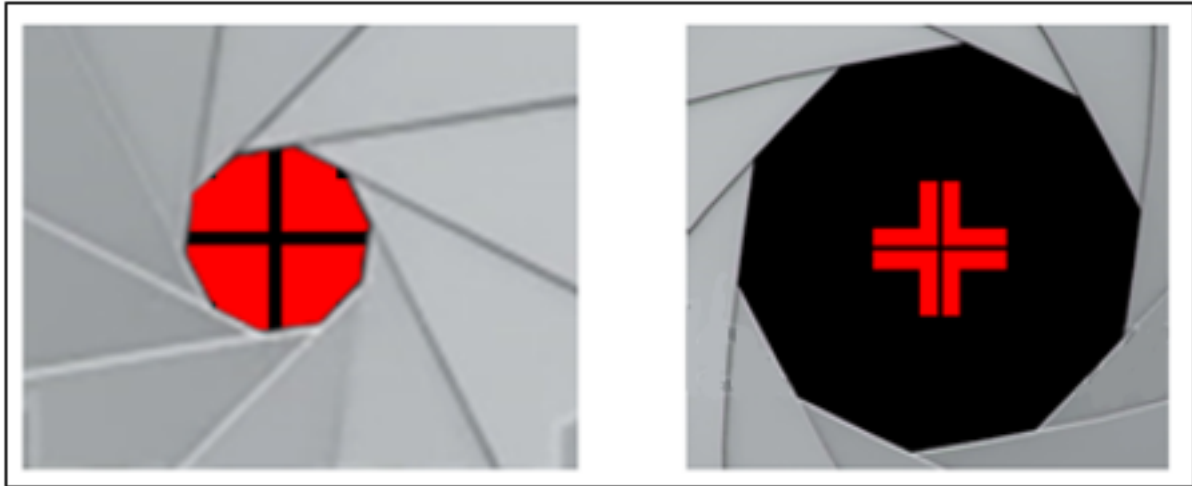

Supplement: mmc2.pdf [file mmc2.pdf]
