# Supplementary material for: Prospective, Longitudinal Pilot Study: Daily Self-Imaging with Patient-Operated Home OCT in Neovascular Age-Related Macular Degeneration
Source: PubMed Central journal article supplement — Ophthalmol Sci. 2021 Jun 26;1(2):100034. doi: 10.1016/j.xops.2021.100034 (PMC9562348; doi:10.1016/j.xops.2021.100034), 2021-06-26

Supplementary Figure 3. Visual x-y direction head positioning and eye fixation system of the Notal Home OCT Device

Left image: patient view with system requiring lateral head movement

Right image: patient view with correct alignment achieved

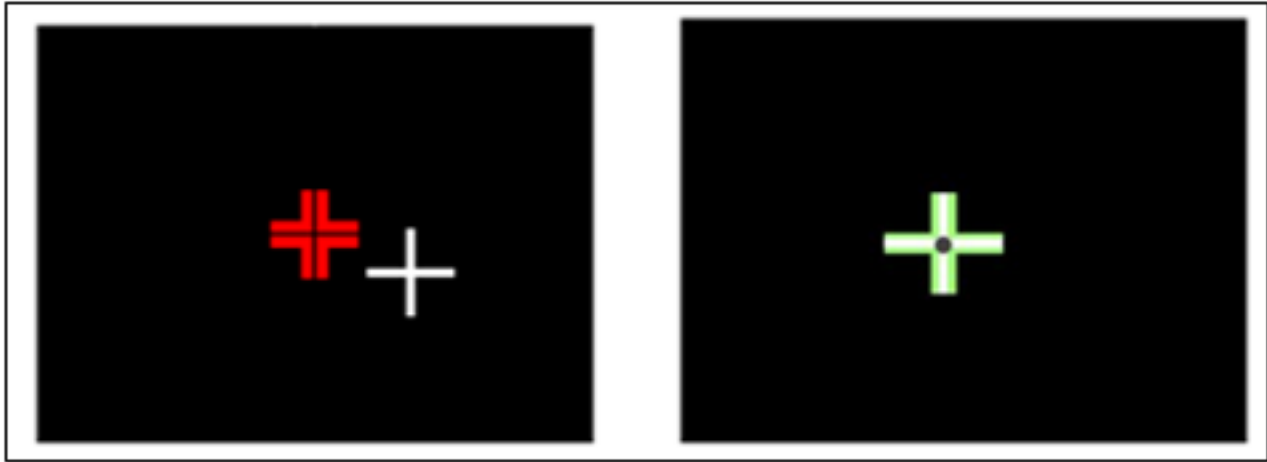

Supplement: mmc3.pdf [file mmc3.pdf]
