# Supplementary material for: Prospective, Longitudinal Pilot Study: Daily Self-Imaging with Patient-Operated Home OCT in Neovascular Age-Related Macular Degeneration
Source: PubMed Central journal article supplement — Ophthalmol Sci. 2021 Jun 26;1(2):100034. doi: 10.1016/j.xops.2021.100034 (PMC9562348; doi:10.1016/j.xops.2021.100034), 2021-06-26

## Supplementary Figure 4. Retinal fluid volume-time curves for study eye 4 OS

The eye received an injection of aflibercept 10 days prior to the beginning of the study period. No or minimal subretinal fluid (SRF) was identified during the first 2 weeks of the study period. SRF appeared approximately 4 weeks after the last injection and increased gradually, while fluctuating, over the following 2 weeks, to approximately 30 nl at the end of the study period. No intraretinal fluid (IRF) was identified during the study period.

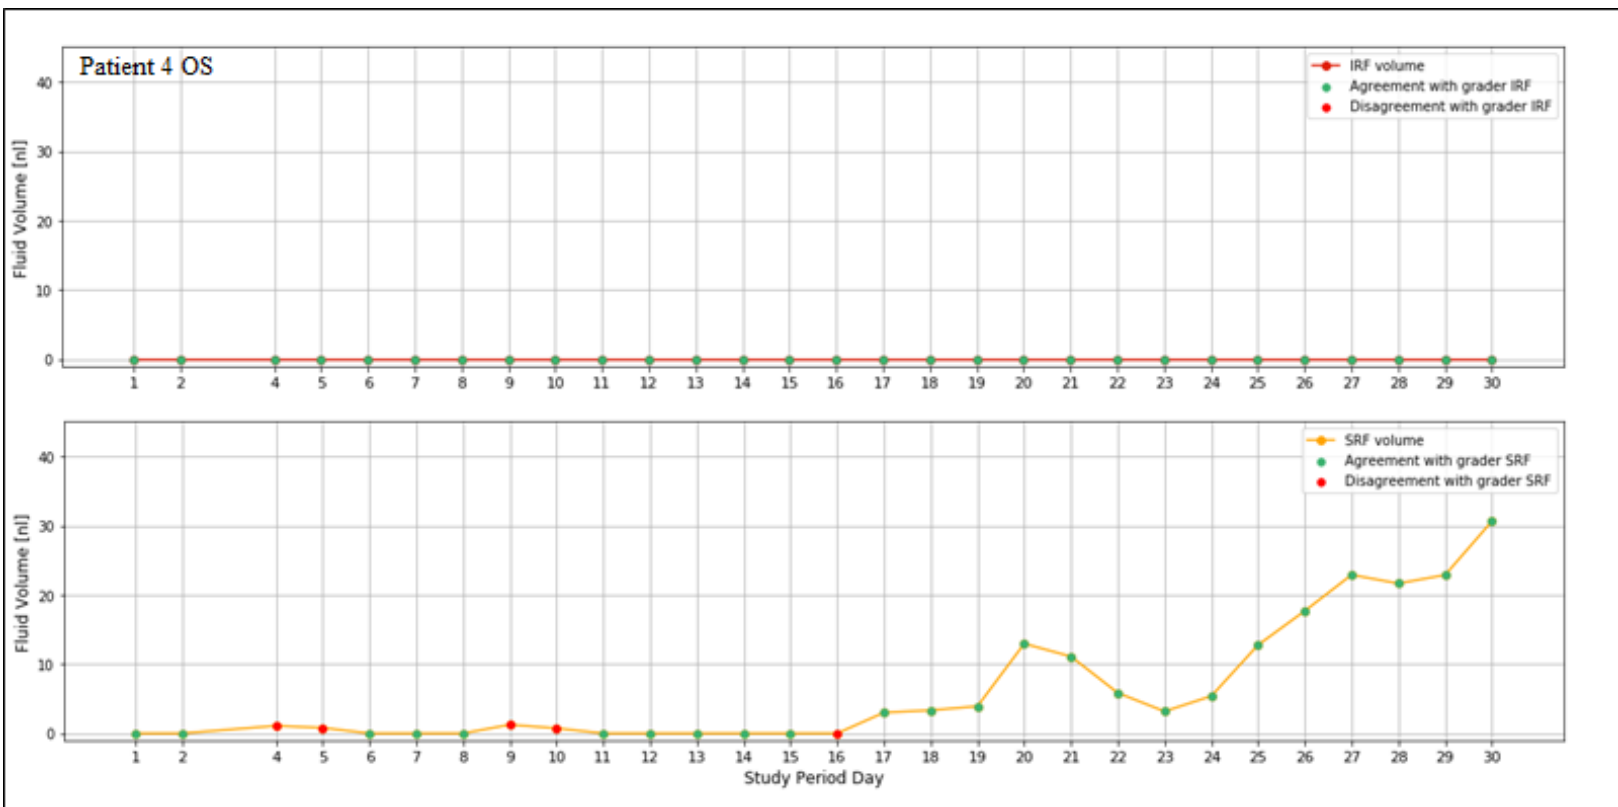

Supplement: mmc4.pdf [file mmc4.pdf]
